# Supplementary material
Source: PubMed Central journal article supplement (PMC2442537)
Supplement: pp.108.119339_1.pdf [file pp.108.119339_1.pdf]

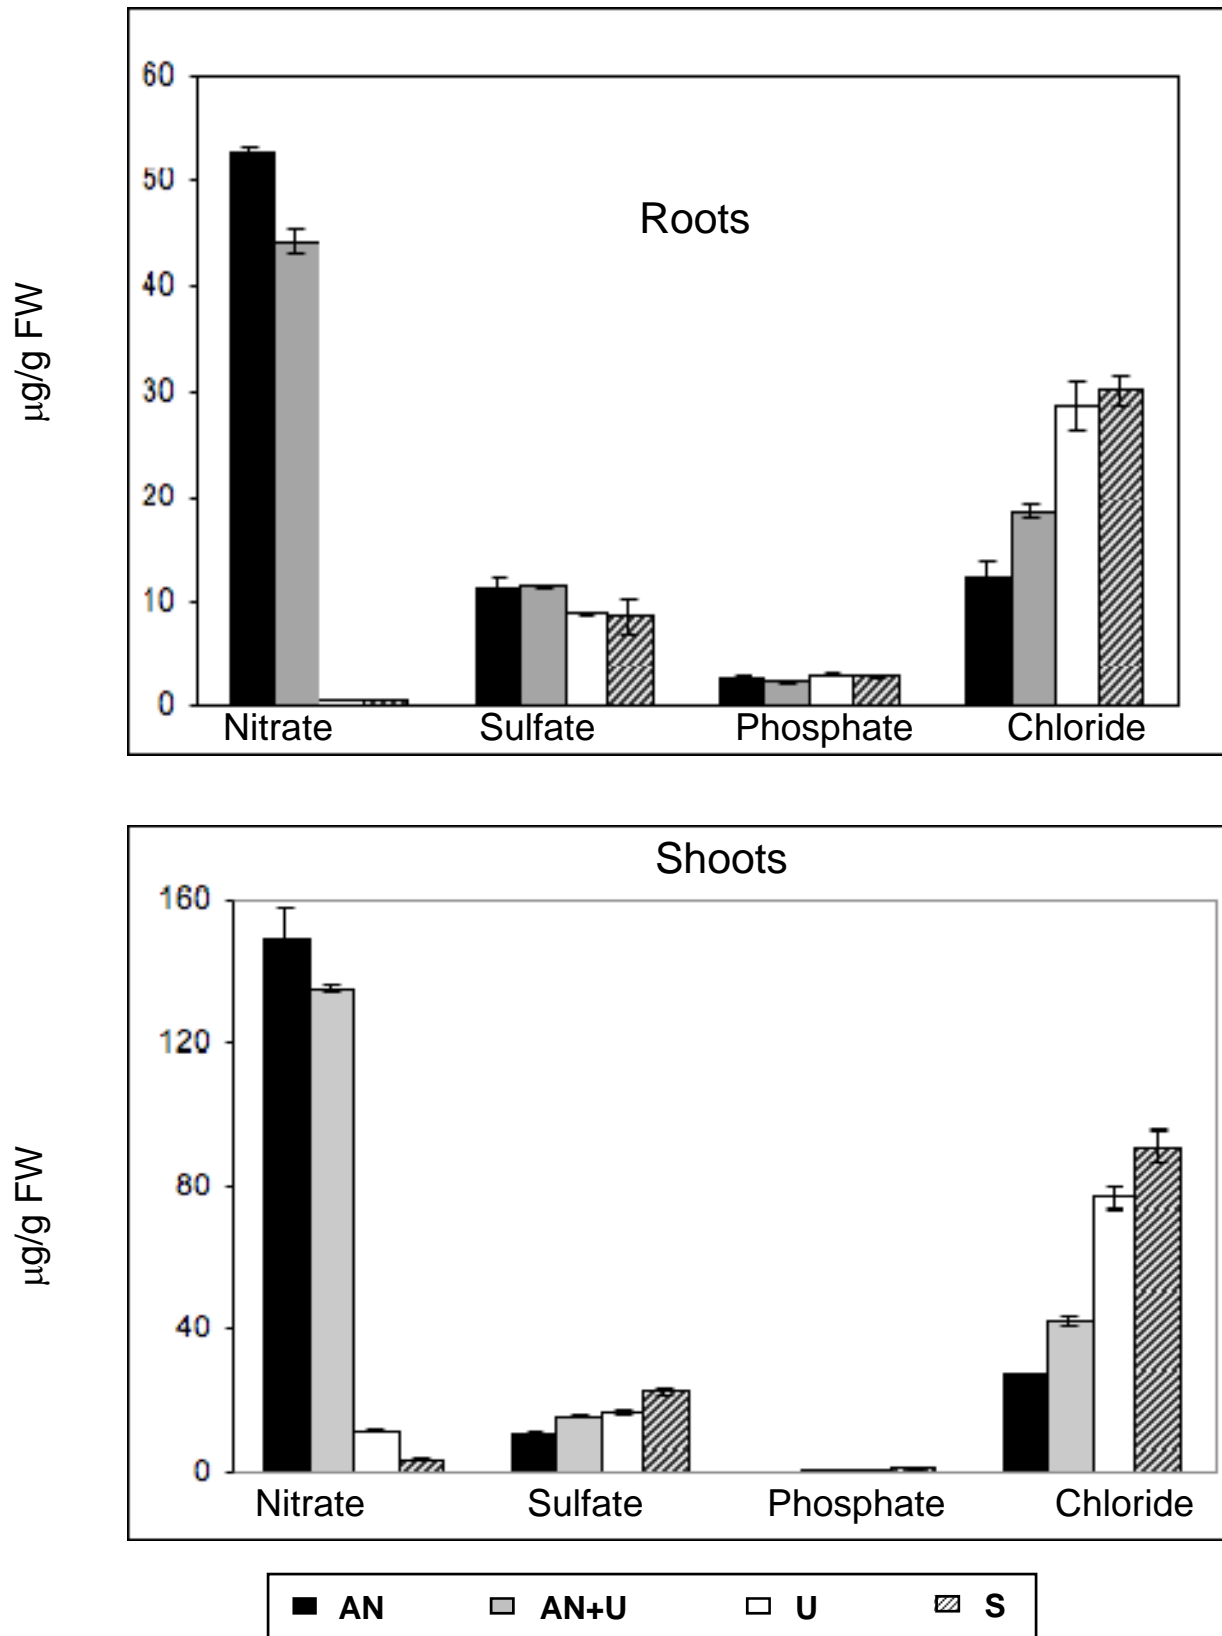

**Figure S1:** Anion contents in roots and shoots were measured on the same plants as described in Fig 1. The values are means  $\pm$  S.D. of 3 replicates.
